# Supplementary material
Source: PubMed Central journal article supplement (PMC3581149)
Supplement: NIHMS441715-supplement-Supp_Table_S1-S4.pdf [file NIHMS441715-supplement-Supp_Table_S1-S4.pdf]

Supplementary Material for  
“An approach for calculating a confidence interval  
from a single aquatic sample for  
monitoring hydrophobic organic contaminants”

Melissa M. Matzke,<sup>\*†</sup> Sarah E. Allan,<sup>‡</sup> Kim A. Anderson,<sup>‡</sup> and Katrina M. Waters<sup>†</sup>

<sup>†</sup> Computational Biology & Bioinformatics, Pacific Northwest National Laboratory, PO Box 999, Richland, WA, USA

<sup>‡</sup> Department of Environmental and Molecular Toxicology, Oregon State University, Corvallis, OR, USA

---

<sup>\*</sup> To whom correspondence may be addressed ([mmatzke@pnnl.gov](mailto:mmatzke@pnnl.gov))

**Table S1.** Sampling frequency used in the pilot study of the Portland Harbor Superfund.

|                                             | 2009             |                | 2010             |                |                |
|---------------------------------------------|------------------|----------------|------------------|----------------|----------------|
|                                             | Summer<br>Site A | Fall<br>Site A | Summer<br>Site A | Fall<br>Site A | Fall<br>Site B |
| <b>Number of Sampling Cages</b>             | 3                | 5              | 1                | 1              | 1              |
| <b>Number of LFT Samplers Within a Cage</b> | 5 <sup>a</sup>   | 5 <sup>a</sup> | 5 <sup>b</sup>   | 5 <sup>b</sup> | 5 <sup>b</sup> |

<sup>a</sup> Chemically analyzed as a single composite sample.

<sup>b</sup> Chemically analyzed as 5 independent samples.

**Table S2. Within Sampling Cage Variance.** Estimates of variance between LFT within a sampling cage for  $\log_{10}$  analyte values. Levene's test is used to test the null hypothesis that the observed within cage variance across the 3 locations are equal.

| Chemical                   | Variance Within Cage            |                                   |                                   | Levene's Test                                           | Pooled Variance Within Cage (Eqn. 1) |
|----------------------------|---------------------------------|-----------------------------------|-----------------------------------|---------------------------------------------------------|--------------------------------------|
|                            | Summer 2010 (r <sub>1</sub> =5) | Fall 2010 – A (r <sub>2</sub> =5) | Fall 2010 – B (r <sub>3</sub> =5) | $H_o : \sigma_1^2 = \sigma_2^2 = \sigma_3^2$<br>P-Value |                                      |
| 1-Methylphenanthrene       | 0.0017                          | 0.0014                            | 0.0005                            | 0.137                                                   | 0.0012                               |
| 1-Methylpyrene             | 0.0005                          | 0.0006                            | 0.0046                            | 0.286                                                   | 0.0019                               |
| 2-methylanthracene         | 0.0007                          | 0.0014                            | 0.0016                            | 0.283                                                   | 0.0012                               |
| 2-Methylphenanthrene       | 0.0013                          | 0.0006                            | 0.0020                            | 0.516                                                   | 0.0013                               |
| 3,6-Dimethylphenanthrene   | Na                              | Na                                | 0.0001                            | Na                                                      | 0.0001                               |
| Acenaphthene               | 0.0054                          | 0.0015                            | 0.0105                            | 0.290                                                   | 0.0058                               |
| Acenaphthylene             | 0.0017                          | 0.0028                            | Na                                | 0.583                                                   | 0.0023                               |
| Anthracene                 | 0.0008                          | 0.0006                            | 0.0011                            | 0.787                                                   | 0.0008                               |
| Benz[a]anthracene          | 0.0003                          | 0.0006                            | 0.0056                            | 0.252                                                   | 0.0022                               |
| Benzo[a]pyrene             | 0.0001                          | 0.0029                            | 0.0052                            | <b>0.048</b>                                            | 0.0027                               |
| Benzo[b]fluoranthene       | 0.0003                          | 0.0008                            | 0.0095                            | 0.211                                                   | 0.0035                               |
| Benzo[e]pyrene             | 0.0005                          | 0.0008                            | 0.0051                            | 0.200                                                   | 0.0021                               |
| Benzo[g,h,i]perylene       | 0.0047                          | 0.0035                            | 0.0005                            | 0.375                                                   | 0.0029                               |
| Benzo[k]fluoranthene       | 0.0010                          | 0.0007                            | 0.0049                            | 0.306                                                   | 0.0022                               |
| Chrysene                   | 0.0006                          | 0.0002                            | 0.0045                            | 0.223                                                   | 0.0018                               |
| Dibenzothiophene           | 0.0024                          | 0.0023                            | 0.0057                            | 0.470                                                   | 0.0035                               |
| Fluoranthene               | 0.0008                          | 0.0004                            | 0.0038                            | 0.281                                                   | 0.0017                               |
| Fluorene                   | 0.0042                          | 0.0014                            | 0.0074                            | 0.411                                                   | 0.0044                               |
| Indeno[1,2,3-c,d]pyrene    | 0.0002                          | 0.0019                            | Na                                | 0.060                                                   | 0.0011                               |
| Naphthalene                | 0.0113                          | 0.0014                            | 0.0021                            | <b>0.014</b>                                            | 0.0052                               |
| Naphthalene, 1,6-dimethyl- | 0.0028                          | 0.0066                            | Na                                | 0.211                                                   | 0.0047                               |
| Naphthalene, 1-methyl-     | 0.0072                          | 0.0015                            | Na                                | 0.120                                                   | 0.0044                               |
| Naphthalene, 2-methyl-     | 0.0079                          | 0.0038                            | 0.0053                            | 0.650                                                   | 0.0057                               |
| Phenanthrene               | 0.0024                          | 0.0008                            | 0.0049                            | 0.341                                                   | 0.0027                               |
| Pyrene                     | 0.0005                          | 0.0009                            | 0.0024                            | 0.422                                                   | 0.0013                               |
| Retene                     | 0.0010                          | 0.0010                            | 0.0012                            | 0.956                                                   | 0.0011                               |

**Table S3. Between Sampling Cage Variance.** Estimates of variance between sampling cages. Estimates of the  $\log_{10}$  analyte values. Levene's test is used to test the null hypothesis that the observed between cage variance across the 2 locations are equal.

| Chemical                   | Variance Between Cage                    |                                        | Levene's Test                              | Pooled Variance<br>Between Cage<br>(Eqn. 2) |
|----------------------------|------------------------------------------|----------------------------------------|--------------------------------------------|---------------------------------------------|
|                            | Summer 2009<br>(n <sub>1</sub> =3 cages) | Fall 2009<br>(n <sub>2</sub> =5 cages) | $H_o : \sigma_1^2 = \sigma_2^2$<br>P-value |                                             |
| 1-Methylphenanthrene       | 0.0023                                   | 0.0018                                 | 0.914                                      | 0.0020                                      |
| 1-Methylpyrene             | 0.0076                                   | 0.0045                                 | 0.670                                      | 0.0055                                      |
| 2-methylanthracene         | 0.0047                                   | 0.0017                                 | 0.193                                      | 0.0027                                      |
| 2-Methylphenanthrene       | 0.0028                                   | 0.0018                                 | 0.686                                      | 0.0022                                      |
| 3,6-Dimethylphenanthrene   | 0.0026                                   | 0.0018                                 | 0.814                                      | 0.0020                                      |
| Acenaphthene               | 0.0014                                   | 0.0034                                 | 0.412                                      | 0.0027                                      |
| Acenaphthylene             | 0.0071                                   | 0.0022                                 | 0.183                                      | 0.0038                                      |
| Anthracene                 | 0.0050                                   | 0.0017                                 | 0.205                                      | 0.0028                                      |
| Benz[a]anthracene          | 0.0058                                   | 0.0028                                 | 0.357                                      | 0.0038                                      |
| Benzo[a]pyrene             | 0.0288                                   | 0.0121                                 | 0.350                                      | 0.0176                                      |
| Benzo[b]fluoranthene       | 0.0240                                   | 0.0054                                 | 0.104                                      | 0.0116                                      |
| Benzo[e]pyrene             | 0.0149                                   | 0.0048                                 | 0.203                                      | 0.0082                                      |
| Benzo[g,h,i]perylene       | 0.0634                                   | 0.0050                                 | <b>0.049</b>                               | 0.0245                                      |
| Benzo[k]fluoranthene       | 0.0268                                   | 0.0123                                 | 0.433                                      | 0.0172                                      |
| Chrysene                   | 0.0044                                   | 0.0030                                 | 0.757                                      | 0.0035                                      |
| Dibenzothiophene           | 0.0029                                   | 0.0024                                 | 0.993                                      | 0.0025                                      |
| Fluoranthene               | 0.0033                                   | 0.0014                                 | 0.315                                      | 0.0020                                      |
| Fluorene                   | 0.0029                                   | 0.0028                                 | 0.859                                      | 0.0029                                      |
| Indeno[1,2,3-c,d]pyrene    | 0.0976                                   | 0.0048                                 | <b>0.042</b>                               | 0.0357                                      |
| Naphthalene                | 0.0029                                   | 0.0064                                 | 0.122                                      | 0.0053                                      |
| Naphthalene, 1,6-dimethyl- | 0.0007                                   | 0.0025                                 | 0.391                                      | 0.0019                                      |
| Naphthalene, 1-methyl-     | 0.0010                                   | 0.0039                                 | 0.430                                      | 0.0029                                      |
| Naphthalene, 2-methyl-     | 0.0028                                   | 0.0050                                 | 0.583                                      | 0.0043                                      |
| Phenanthrene               | 0.0024                                   | 0.0017                                 | 0.817                                      | 0.0019                                      |
| Pyrene                     | 0.0040                                   | 0.0017                                 | 0.299                                      | 0.0024                                      |
| Retene                     | 0.0036                                   | 0.0020                                 | 0.583                                      | 0.0025                                      |

**Table S4.** 95% confidence intervals for the log<sub>10</sub> mean (pg/μL) based on a single observation sampling events (n=1) at the Portland Harbor Superfund during fall 2009 to fall 2010.

| Chemical                         | Superfund Site 1 |                |                | Superfund Site 2 |                |                | Upstream       |                |                |
|----------------------------------|------------------|----------------|----------------|------------------|----------------|----------------|----------------|----------------|----------------|
|                                  | Fall 2009        | Summer 2010    | Fall 2010      | Fall 2009        | Summer 2010    | Fall 2010      | Fall 2009      | Summer 2010    | Fall 2010      |
| 1-Methylphenanthrene             | (2.423, 2.598)   | (2.553, 2.728) | (2.538, 2.713) | (2.906, 3.082)   | (2.788, 2.964) | (3.032, 3.207) | (1.812, 1.988) | Na             | (1.801, 1.976) |
| 1-Methylpyrene                   | (2.143, 2.434)   | (1.980, 2.271) | (2.237, 2.528) | (2.701, 2.992)   | (2.284, 2.574) | (2.544, 2.834) | (1.377, 1.668) | (1.352, 1.643) | (1.713, 2.003) |
| 2-methylanthracene               | (2.141, 2.345)   | (2.098, 2.302) | (2.038, 2.241) | (2.614, 2.818)   | (2.425, 2.628) | (2.598, 2.802) | (2.114, 2.317) | Na             | (1.862, 2.066) |
| 2-Methylphenanthrene             | (2.485, 2.668)   | (2.568, 2.752) | (2.502, 2.686) | (3.126, 3.31)    | (3.017, 3.201) | (3.158, 3.342) | (2.118, 2.302) | (2.188, 2.372) | (2.062, 2.246) |
| 3,6-Dimethylphenanthrene         | (2.454, 2.630)   | (2.152, 2.327) | Na             | (2.719, 2.894)   | (2.383, 2.559) | (2.578, 2.753) | Na             | (1.795, 1.971) | (2.132, 2.307) |
| Acenaphthene                     | (2.416, 2.619)   | (2.201, 2.405) | (2.204, 2.408) | (2.747, 2.95)    | (2.660, 2.863) | (2.860, 3.064) | Na             | (1.637, 1.840) | Na             |
| Acenaphthylene                   | (1.220, 1.462)   | (1.287, 1.529) | (1.562, 1.804) | (1.558, 1.799)   | (1.593, 1.835) | (2.059, 2.301) | Na             | Na             | Na             |
| Anthracene                       | (2.360, 2.568)   | (2.447, 2.654) | (2.328, 2.535) | (2.961, 3.169)   | (2.829, 3.037) | (2.938, 3.145) | (1.454, 1.661) | (1.767, 1.974) | (1.731, 1.938) |
| Benz[ <i>a</i> ]anthracene       | (2.754, 2.996)   | (2.657, 2.899) | (2.790, 3.031) | (3.337, 3.579)   | (2.904, 3.146) | (3.315, 3.556) | (2.358, 2.599) | (1.856, 2.097) | (2.280, 2.522) |
| Benzo[ <i>a</i> ]pyrene          | (1.807, 2.327)   | (1.450, 1.970) | Na             | (2.367, 2.887)   | (1.861, 2.381) | (2.422, 2.942) | Na             | (0.697, 1.217) | Na             |
| Benzo[ <i>b</i> ]fluoranthene    | (1.981, 2.403)   | (1.728, 2.150) | (2.227, 2.649) | (2.596, 3.018)   | (2.094, 2.516) | (2.668, 3.09)  | (1.183, 1.605) | (0.917, 1.339) | (1.717, 2.139) |
| Benzo[ <i>e</i> ]pyrene          | (1.991, 2.346)   | (1.829, 2.184) | Na             | (2.466, 2.821)   | (2.104, 2.459) | (2.326, 2.681) | (1.675, 2.03)  | (1.301, 1.656) | Na             |
| Benzo[ <i>g,h,i</i> ]perylene    | (1.293, 1.906)   | (1.064, 1.678) | (1.427, 2.04)  | (1.803, 2.417)   | (1.373, 1.986) | (1.863, 2.477) | (0.825, 1.439) | (0.636, 1.25)  | (1.302, 1.916) |
| Benzo[ <i>k</i> ]fluoranthene    | (1.926, 2.44)    | (1.053, 1.567) | (1.754, 2.268) | (2.056, 2.57)    | (1.556, 2.070) | (2.214, 2.728) | (0.689, 1.204) | Na             | (1.281, 1.795) |
| Chrysene                         | (2.919, 3.151)   | (2.743, 2.975) | (3.043, 3.275) | (3.402, 3.633)   | (3.032, 3.264) | (3.430, 3.662) | (2.042, 2.274) | (2.020, 2.252) | (2.542, 2.774) |
| Dibenzothiophene                 | (2.049, 2.245)   | (1.939, 2.135) | (2.000, 2.196) | (2.695, 2.891)   | (2.478, 2.674) | (2.695, 2.891) | Na             | (1.281, 1.477) | Na             |
| Fluoranthene                     | (3.749, 3.924)   | (3.508, 3.683) | (3.682, 3.858) | (4.144, 4.319)   | (3.810, 3.985) | (4.160, 4.335) | (2.638, 2.813) | (2.693, 2.868) | (2.936, 3.112) |
| Fluorene                         | (2.509, 2.72)    | (2.188, 2.399) | (2.281, 2.492) | (2.670, 2.882)   | (2.536, 2.747) | (2.848, 3.060) | (1.468, 1.679) | (1.823, 2.034) | (1.724, 1.935) |
| Indeno[ <i>1,2,3-c,d</i> ]pyrene | (0.989, 1.729)   | (0.870, 1.611) | (1.084, 1.825) | (1.437, 2.178)   | (1.063, 1.803) | (1.536, 2.277) | Na             | Na             | (0.831, 1.571) |
| Naphthalene                      | (1.419, 1.704)   | (1.526, 1.811) | (1.906, 2.192) | (1.673, 1.958)   | (1.962, 2.247) | (2.900, 3.186) | (0.986, 1.271) | (1.499, 1.784) | (1.753, 2.038) |
| Naphthalene, 1,6-dimethyl-       | (1.650, 1.821)   | (1.646, 1.817) | (1.777, 1.948) | (2.073, 2.244)   | (2.243, 2.414) | (2.266, 2.436) | (1.430, 1.601) | (1.932, 2.103) | (1.655, 1.826) |
| Naphthalene, 1-methyl-           | (1.711, 1.922)   | (1.829, 2.04)  | (1.771, 1.982) | (1.890, 2.101)   | (2.162, 2.373) | (2.575, 2.786) | (1.381, 1.592) | (1.915, 2.126) | (1.762, 1.973) |
| Naphthalene, 2-methyl-           | (1.789, 2.046)   | (1.918, 2.175) | (1.858, 2.115) | (1.914, 2.171)   | (2.274, 2.531) | (2.770, 3.027) | (1.535, 1.792) | (2.010, 2.267) | (1.968, 2.225) |
| Phenanthrene                     | (3.037, 3.208)   | (3.048, 3.219) | (2.875, 3.046) | (3.660, 3.831)   | (3.524, 3.695) | (3.598, 3.769) | (2.045, 2.216) | (2.534, 2.705) | (1.958, 2.128) |
| Pyrene                           | (3.780, 3.972)   | (3.539, 3.731) | (3.704, 3.896) | (4.194, 4.386)   | (3.834, 4.026) | (4.169, 4.361) | (2.620, 2.812) | (2.660, 2.852) | (3.056, 3.248) |
| Retene                           | (3.085, 3.281)   | (2.940, 3.136) | (3.111, 3.307) | (3.122, 3.318)   | (2.980, 3.176) | (3.242, 3.438) | (2.518, 2.714) | (2.626, 2.822) | (3.074, 3.27)  |
